# Supplementary material for: New Insights into the Roles of Host Gene-Necrotrophic Effector Interactions in Governing Susceptibility of Durum Wheat to Tan Spot and Septoria nodorum Blotch
Source: PubMed Central journal article supplement (PMC5144982; doi:10.1534/g3.116.036525), 2016-10-24
Supplement: supp_g3.116.036525_TableS1.pdf [file supp_g3.116.036525_TableS1.pdf]

**SUPPLEMENTARY MATERIALS**

**Table S1. Molecular markers, their chromosome assignments, centiMorgan positions, and deviation from expected segregation ratios in the AL population. Markers in bold are simple sequence repeat (SSR) markers and all others are single nucleotide polymorphism (SNP) markers.**

|    |    | Marker                 | Chromosome | Position | Deviation from 1:1 segregation |
|----|----|------------------------|------------|----------|--------------------------------|
| 1  | 1  | <b><i>Xcfa2153</i></b> | 1A         | 0        | ns                             |
| 2  | 2  | <i>Xiwa8622</i>        | 1A         | 1.78621  | ns                             |
| 3  | 3  | <i>Xiwa5150</i>        | 1A         | 2.15385  | ns                             |
| 4  | 4  | <i>Xiwa6649</i>        | 1A         | 2.52148  | ns                             |
| 5  | 5  | <i>Xiwa4351</i>        | 1A         | 2.52148  | ns                             |
| 6  | 6  | <i>Xiwa145</i>         | 1A         | 37.7337  | ns                             |
| 7  | 7  | <i>Xiwa3435</i>        | 1A         | 37.7337  | ns                             |
| 8  | 8  | <i>Xiwa8482</i>        | 1A         | 37.7337  | ns                             |
| 9  | 9  | <i>Xiwa6042</i>        | 1A         | 37.7337  | ns                             |
| 10 | 10 | <i>Xiwa3805</i>        | 1A         | 37.7337  | ns                             |
| 11 | 11 | <i>Xiwa3434</i>        | 1A         | 37.7337  | ns                             |
| 12 | 12 | <i>Xiwa8223</i>        | 1A         | 41.2549  | ns                             |
| 13 | 13 | <i>Xiwa6934</i>        | 1A         | 41.2549  | ns                             |
| 14 | 14 | <i>Xiwa4537</i>        | 1A         | 41.2549  | ns                             |
| 15 | 15 | <i>Xiwa4080</i>        | 1A         | 41.2549  | ns                             |
| 16 | 16 | <i>Xiwa531</i>         | 1A         | 41.2549  | ns                             |
| 17 | 17 | <i>Xiwa2056</i>        | 1A         | 66.2672  | ns                             |
| 18 | 18 | <i>Xiwa6217</i>        | 1A         | 67.3785  | ns                             |
| 19 | 19 | <b><i>Xwmc24</i></b>   | 1A         | 67.3785  | ns                             |
| 20 | 20 | <i>Xiwa3374</i>        | 1A         | 70.872   | ns                             |
| 21 | 21 | <i>Xiwa3373</i>        | 1A         | 70.872   | ns                             |
| 22 | 22 | <i>Xiwa3375</i>        | 1A         | 70.872   | ns                             |
| 23 | 23 | <i>Xiwa8236</i>        | 1A         | 82.119   | ns                             |
| 24 | 24 | <i>Xiwa1991</i>        | 1A         | 82.119   | ns                             |
| 25 | 25 | <i>Xiwa8394</i>        | 1A         | 82.119   | ns                             |
| 26 | 26 | <i>Xiwa7505</i>        | 1A         | 82.119   | ns                             |
| 27 | 27 | <i>Xiwa6887</i>        | 1A         | 82.119   | ns                             |
| 28 | 28 | <i>Xiwa2651</i>        | 1A         | 82.119   | ns                             |
| 29 | 29 | <i>Xiwa2438</i>        | 1A         | 82.119   | ns                             |
| 30 | 30 | <i>Xiwa393</i>         | 1A         | 82.119   | ns                             |
| 31 | 31 | <i>Xiwa392</i>         | 1A         | 82.119   | ns                             |
| 32 | 32 | <i>Xiwa357</i>         | 1A         | 82.119   | ns                             |
| 33 | 33 | <i>Xiwa3665</i>        | 1A         | 84.3932  | ns                             |

|    |    |                         |    |         |    |
|----|----|-------------------------|----|---------|----|
| 34 | 34 | <i>Xiwa3806</i>         | 1A | 84.3932 | ns |
| 35 | 35 | <i>Xiwa3957</i>         | 1A | 84.3932 | ns |
| 36 | 36 | <i>Xiwa5011</i>         | 1A | 84.3932 | ns |
| 37 | 37 | <i>Xiwa498</i>          | 1A | 84.3932 | ns |
| 38 | 38 | <i>Xiwa3160</i>         | 1A | 84.3932 | ns |
| 39 | 39 | <b><i>Xbarc28.1</i></b> | 1A | 86.2009 | ns |
| 40 | 40 | <b><i>Xcfa2135</i></b>  | 1A | 88.4747 | ns |
| 41 | 41 | <i>Xiwa7898</i>         | 1A | 101.008 | ns |
| 42 | 42 | <i>Xiwa2598</i>         | 1A | 101.008 | ns |
| 43 | 43 | <i>Xiwa2584</i>         | 1A | 101.008 | ns |
| 44 | 44 | <i>Xiwa1594</i>         | 1A | 101.008 | ns |
| 45 | 45 | <i>Xiwa6709</i>         | 1A | 101.372 | ns |
| 46 | 46 | <i>Xiwa8070</i>         | 1A | 101.372 | ns |
| 47 | 47 | <i>Xiwa5839</i>         | 1A | 101.372 | ns |
| 48 | 48 | <i>Xiwa6756</i>         | 1A | 101.372 | ns |
| 49 | 49 | <i>Xiwa4126</i>         | 1A | 101.372 | ns |
| 50 | 50 | <i>Xiwa4117</i>         | 1A | 101.372 | ns |
| 51 | 51 | <i>Xiwa4116</i>         | 1A | 101.372 | ns |
| 52 | 52 | <i>Xiwa268</i>          | 1A | 101.372 | ns |
| 53 | 53 | <i>Xiwa2152</i>         | 1A | 101.737 | ns |
| 54 | 54 | <i>Xiwa1615</i>         | 1A | 101.737 | ns |
| 55 | 55 | <i>Xiwa6835</i>         | 1A | 101.737 | ns |
| 56 | 56 | <i>Xiwa8523</i>         | 1A | 128.135 | ns |
| 57 | 57 | <i>Xiwa8528</i>         | 1A | 128.135 | ns |
| 58 | 58 | <i>Xiwa1710</i>         | 1A | 128.87  | ns |
| 59 | 59 | <i>Xiwa5407</i>         | 1A | 128.87  | ns |
| 60 | 60 | <i>Xiwa8020</i>         | 1A | 130.751 | ns |
| 61 | 61 | <i>Xiwa2035</i>         | 1A | 132.617 | ns |
| 62 | 62 | <i>Xiwa3089</i>         | 1A | 132.617 | ns |
| 63 | 63 | <i>Xiwa6458</i>         | 1A | 132.617 | ns |
| 64 | 64 | <i>Xiwa1559</i>         | 1A | 132.617 | ns |
| 65 | 65 | <i>Xiwa1560</i>         | 1A | 132.617 | ns |
| 66 | 66 | <i>Xiwa1558</i>         | 1A | 132.617 | ns |
| 67 | 67 | <i>Xiwa1557</i>         | 1A | 132.617 | ns |
| 68 | 68 | <i>Xiwa2317</i>         | 1A | 134.891 | ns |
| 69 | 69 | <i>Xiwa3409</i>         | 1A | 144.49  | ns |

|    |   |                             |    |         |    |
|----|---|-----------------------------|----|---------|----|
| 70 | 1 | <b><i>Xfcp667(Snn1)</i></b> | 1B | 0       | ns |
| 71 | 2 | <i>Xiwa6787</i>             | 1B | 28.3216 | ns |
| 72 | 3 | <i>Xiwa4349</i>             | 1B | 28.3216 | ns |

|     |    |                  |    |         |    |
|-----|----|------------------|----|---------|----|
| 73  | 4  | <i>Xhbe482</i>   | 1B | 30.2091 | ns |
| 74  | 5  | <i>Xbarc8</i>    | 1B | 32.6618 | ns |
| 75  | 6  | <i>Xhbg326</i>   | 1B | 33.1426 | *  |
| 76  | 7  | <i>Xiwa7703</i>  | 1B | 35.8974 | ns |
| 77  | 8  | <i>Xiwa6448</i>  | 1B | 37.7638 | ns |
| 78  | 9  | <i>Xiwa6450</i>  | 1B | 37.7638 | ns |
| 79  | 10 | <i>Xiwa8338</i>  | 1B | 45.2569 | ns |
| 80  | 11 | <i>Xiwa5681</i>  | 1B | 45.2569 | ns |
| 81  | 12 | <i>Xiwa7219</i>  | 1B | 45.2569 | ns |
| 82  | 13 | <i>Xiwa5592</i>  | 1B | 45.2569 | ns |
| 83  | 14 | <i>Xiwa1884</i>  | 1B | 45.2569 | ns |
| 84  | 15 | <i>Xiwa1451</i>  | 1B | 45.2569 | ns |
| 85  | 16 | <i>Xiwa580</i>   | 1B | 45.2569 | ns |
| 86  | 17 | <i>Xiwa284</i>   | 1B | 45.2569 | ns |
| 87  | 18 | <i>Xbarc137</i>  | 1B | 47.6624 | ns |
| 88  | 19 | <i>Xgwm18</i>    | 1B | 47.6624 | ns |
| 89  | 20 | <i>Xhbg419</i>   | 1B | 48.1128 | ns |
| 90  | 21 | <i>Xgwm11</i>    | 1B | 48.1128 | ns |
| 91  | 22 | <i>Xcfd59</i>    | 1B | 48.1128 | ns |
| 92  | 23 | <i>Xgwm264.1</i> | 1B | 51.7774 | ns |
| 93  | 24 | <i>Xiwa43</i>    | 1B | 55.1913 | *  |
| 94  | 25 | <i>Xiwa44</i>    | 1B | 55.1913 | *  |
| 95  | 26 | <i>Xiwa107</i>   | 1B | 55.5536 | *  |
| 96  | 27 | <i>Xiwa378</i>   | 1B | 55.9159 | ns |
| 97  | 28 | <i>Xiwa8081</i>  | 1B | 61.0927 | ns |
| 98  | 29 | <i>Xiwa7119</i>  | 1B | 61.0927 | ns |
| 99  | 30 | <i>Xiwa6063</i>  | 1B | 61.0927 | ns |
| 100 | 31 | <i>Xiwa5348</i>  | 1B | 61.0927 | ns |
| 101 | 32 | <i>Xiwa7723</i>  | 1B | 61.455  | ns |
| 102 | 33 | <i>Xiwa7722</i>  | 1B | 61.455  | ns |
| 103 | 34 | <i>Xiwa7721</i>  | 1B | 61.455  | ns |
| 104 | 35 | <i>Xiwa5561</i>  | 1B | 61.455  | ns |
| 105 | 36 | <i>Xiwa3587</i>  | 1B | 61.455  | ns |
| 106 | 37 | <i>Xiwa3502</i>  | 1B | 61.455  | ns |
| 107 | 38 | <i>Xiwa2517</i>  | 1B | 61.455  | ns |
| 108 | 39 | <i>Xiwa1109</i>  | 1B | 61.455  | ns |
| 109 | 40 | <i>Xhbg258.1</i> | 1B | 64.2099 | ns |
| 110 | 41 | <i>Xgwm131</i>   | 1B | 65.2408 | ns |
| 111 | 42 | <i>Xiwa128</i>   | 1B | 67.3036 | *  |
| 112 | 43 | <i>Xiwa4681</i>  | 1B | 87.0849 | *  |
| 113 | 44 | <i>Xiwa4680</i>  | 1B | 87.0849 | *  |

|     |    |                         |    |         |    |
|-----|----|-------------------------|----|---------|----|
| 114 | 45 | <i>Xiwa5070</i>         | 1B | 88.5668 | *  |
| 115 | 46 | <i>Xiwa6945</i>         | 1B | 88.5668 | *  |
| 116 | 47 | <i>Xiwa6134</i>         | 1B | 89.2967 | ns |
| 117 | 48 | <b><i>Xhbg262.2</i></b> | 1B | 94.4546 | ns |
| 118 | 49 | <b><i>Xwmc134</i></b>   | 1B | 108.886 | ns |
| 119 | 50 | <i>Xiwa5186</i>         | 1B | 121.077 | ns |
| 120 | 51 | <i>Xiwa3017</i>         | 1B | 124.134 | ns |
| 121 | 52 | <i>Xiwa6646</i>         | 1B | 124.496 | ns |
| 122 | 53 | <i>Xiwa4155</i>         | 1B | 125.226 | ns |
| 123 | 54 | <i>Xiwa4154</i>         | 1B | 125.588 | ns |
| 124 | 55 | <b><i>Xbarc81</i></b>   | 1B | 126.051 | ns |
| 125 | 56 | <b><i>Xgwm153</i></b>   | 1B | 126.577 | ns |
| 126 | 57 | <i>Xiwa5749</i>         | 1B | 127.093 | ns |
| 127 | 58 | <i>Xiwa2064</i>         | 1B | 127.458 | ns |
| 128 | 59 | <i>Xiwa3097</i>         | 1B | 130.952 | ns |
| 129 | 60 | <b><i>Xhbg262.1</i></b> | 1B | 145.461 | ns |
| 130 | 61 | <b><i>Xwmc44</i></b>    | 1B | 146.405 | ns |
| 131 | 62 | <i>Xiwa919</i>          | 1B | 149.808 | ns |
| 132 | 63 | <i>Xiwa8332</i>         | 1B | 150.17  | ns |
| 133 | 64 | <i>Xiwa7992</i>         | 1B | 150.17  | ns |
| 134 | 65 | <i>Xiwa3893</i>         | 1B | 150.532 | ns |
| 135 | 66 | <i>Xiwa3892</i>         | 1B | 150.532 | ns |
| 136 | 67 | <i>Xiwa3660</i>         | 1B | 150.532 | ns |
| 137 | 68 | <i>Xiwa848</i>          | 1B | 150.532 | ns |
| 138 | 69 | <i>Xiwa846</i>          | 1B | 150.532 | ns |
| 139 | 70 | <b><i>Xhbe248</i></b>   | 1B | 151.476 | ns |
| 140 | 71 | <b><i>Xhbg236</i></b>   | 1B | 151.476 | ns |
| 141 | 72 | <b><i>Xhbg443</i></b>   | 1B | 157.566 | *  |
| 142 | 73 | <i>Xiwa725</i>          | 1B | 159.84  | *  |
| 143 | 74 | <i>Xiwa724</i>          | 1B | 159.84  | *  |

|     |   |                       |    |         |    |
|-----|---|-----------------------|----|---------|----|
| 144 | 1 | <b><i>Xhbg224</i></b> | 2A | 0       | *  |
| 145 | 2 | <i>Xiwa1512</i>       | 2A | 30.0256 | ns |
| 146 | 3 | <i>Xiwa6391</i>       | 2A | 30.0256 | ns |
| 147 | 4 | <i>Xiwa5423</i>       | 2A | 30.0256 | ns |
| 148 | 5 | <i>Xiwa5341</i>       | 2A | 30.0256 | ns |
| 149 | 6 | <i>Xiwa5340</i>       | 2A | 30.0256 | ns |
| 150 | 7 | <i>Xiwa1511</i>       | 2A | 30.0256 | ns |
| 151 | 8 | <i>Xiwa6922</i>       | 2A | 30.3879 | ns |
| 152 | 9 | <i>Xiwa4989</i>       | 2A | 30.3879 | ns |

|     |    |                        |    |         |    |
|-----|----|------------------------|----|---------|----|
| 153 | 10 | <i>Xiwa965</i>         | 2A | 35.1262 | ns |
| 154 | 11 | <i>Xiwa8513</i>        | 2A | 38.593  | ns |
| 155 | 12 | <i>Xiwa2434</i>        | 2A | 54.0162 | ns |
| 156 | 13 | <i>Xiwa2433</i>        | 2A | 54.0162 | ns |
| 157 | 14 | <i>Xiwa2526</i>        | 2A | 54.7462 | ns |
| 158 | 15 | <b><i>Xcfa2201</i></b> | 2A | 57.836  | ns |
| 159 | 16 | <i>Xiwa5240</i>        | 2A | 79.5999 | ns |
| 160 | 17 | <i>Xiwa313</i>         | 2A | 79.5999 | ns |
| 161 | 18 | <i>Xiwa8491</i>        | 2A | 79.5999 | ns |
| 162 | 19 | <i>Xiwa7248</i>        | 2A | 79.5999 | ns |
| 163 | 20 | <i>Xiwa6369</i>        | 2A | 79.5999 | ns |
| 164 | 21 | <i>Xiwa5586</i>        | 2A | 79.5999 | ns |
| 165 | 22 | <i>Xiwa3569</i>        | 2A | 79.5999 | ns |
| 166 | 23 | <i>Xiwa2259</i>        | 2A | 79.5999 | ns |
| 167 | 24 | <i>Xiwa2245</i>        | 2A | 79.5999 | ns |
| 168 | 25 | <i>Xiwa1597</i>        | 2A | 79.5999 | ns |
| 169 | 26 | <i>Xiwa1256</i>        | 2A | 79.5999 | ns |
| 170 | 27 | <i>Xiwa994</i>         | 2A | 79.5999 | ns |
| 171 | 28 | <i>Xiwa424</i>         | 2A | 79.5999 | ns |
| 172 | 29 | <i>Xiwa343</i>         | 2A | 79.5999 | ns |
| 173 | 30 | <i>Xiwa314</i>         | 2A | 79.5999 | ns |
| 174 | 31 | <i>Xiwa690</i>         | 2A | 80.3298 | ns |
| 175 | 32 | <i>Xiwa581</i>         | 2A | 81.0598 | ns |
| 176 | 33 | <i>Xiwa8328</i>        | 2A | 81.4221 | ns |
| 177 | 34 | <i>Xiwa8036</i>        | 2A | 114.505 | ns |
| 178 | 35 | <i>Xiwa2601</i>        | 2A | 114.505 | ns |
| 179 | 36 | <i>Xiwa4870</i>        | 2A | 117.159 | ns |
| 180 | 37 | <i>Xiwa3596</i>        | 2A | 117.159 | ns |
| 181 | 38 | <i>Xiwa1348</i>        | 2A | 117.159 | ns |
| 182 | 39 | <i>Xiwa8402</i>        | 2A | 117.159 | ns |
| 183 | 40 | <i>Xiwa6620</i>        | 2A | 117.159 | ns |
| 184 | 41 | <i>Xiwa1351</i>        | 2A | 117.159 | ns |
| 185 | 42 | <i>Xiwa1350</i>        | 2A | 117.159 | ns |
| 186 | 43 | <i>Xiwa1347</i>        | 2A | 117.159 | ns |
| 187 | 44 | <i>Xiwa6839</i>        | 2A | 117.159 | ns |
| 188 | 45 | <i>Xiwa6600</i>        | 2A | 117.159 | ns |
| 189 | 46 | <i>Xiwa3594</i>        | 2A | 117.159 | ns |
| 190 | 47 | <i>Xiwa1349</i>        | 2A | 117.159 | ns |
| 191 | 48 | <i>Xiwa319</i>         | 2A | 117.159 | ns |
| 192 | 49 | <i>Xiwa2778</i>        | 2A | 125.642 | ns |
| 193 | 50 | <i>Xiwa4491</i>        | 2A | 125.642 | ns |

|     |    |                       |    |         |    |
|-----|----|-----------------------|----|---------|----|
| 194 | 51 | <i>Xiwa4493</i>       | 2A | 125.642 | ns |
| 195 | 52 | <i>Xiwa5879</i>       | 2A | 125.642 | ns |
| 196 | 53 | <i>Xiwa6963</i>       | 2A | 125.642 | ns |
| 197 | 54 | <i>Xiwa7327</i>       | 2A | 125.642 | ns |
| 198 | 55 | <i>Xiwa1088</i>       | 2A | 125.642 | ns |
| 199 | 56 | <i>Xiwa7335</i>       | 2A | 125.642 | ns |
| 200 | 57 | <i>Xiwa8325</i>       | 2A | 125.642 | ns |
| 201 | 58 | <i>Xiwa2370</i>       | 2A | 149.744 | ns |
| 202 | 59 | <i>Xiwa5959</i>       | 2A | 156.284 | ns |
| 203 | 60 | <b><i>Xwmc181</i></b> | 2A | 162.897 | *  |
| 204 | 61 | <b><i>Xhbg327</i></b> | 2A | 178.679 | ns |

|     |    |                         |    |         |     |
|-----|----|-------------------------|----|---------|-----|
| 205 | 1  | <b><i>Xwmc382.2</i></b> | 2B | 0       | *** |
| 206 | 2  | <b><i>Xwmc764</i></b>   | 2B | 0.40321 | **  |
| 207 | 3  | <i>Xiwa6957</i>         | 2B | 0.40321 | *** |
| 208 | 4  | <b><i>Xwmc661</i></b>   | 2B | 4.25669 | **  |
| 209 | 5  | <i>Xiwa2304</i>         | 2B | 8.11017 | *   |
| 210 | 6  | <b><i>Xhbg216</i></b>   | 2B | 11.9636 | ns  |
| 211 | 7  | <b><i>Tsc2</i></b>      | 2B | 18.5428 | ns  |
| 212 | 8  | <b><i>Xwmc25</i></b>    | 2B | 29.841  | ns  |
| 213 | 9  | <b><i>Xwmc154</i></b>   | 2B | 35.2007 | ns  |
| 214 | 10 | <i>Xiwa6474</i>         | 2B | 57.3234 | ns  |
| 215 | 11 | <i>Xiwa1360</i>         | 2B | 57.3234 | ns  |
| 216 | 12 | <i>Xiwa1359</i>         | 2B | 57.3234 | ns  |
| 217 | 13 | <b><i>Xwmc597</i></b>   | 2B | 78.0516 | *   |
| 218 | 14 | <i>Xiwa6069</i>         | 2B | 93.2027 | ns  |
| 219 | 15 | <i>Xiwa5392</i>         | 2B | 93.2027 | ns  |
| 220 | 16 | <b><i>Xbarc55</i></b>   | 2B | 98.98   | ns  |
| 221 | 17 | <i>Xiwa8221</i>         | 2B | 99.38   | ns  |
| 222 | 18 | <i>Xiwa4323</i>         | 2B | 99.38   | ns  |
| 223 | 19 | <i>Xiwa7661</i>         | 2B | 101.637 | ns  |
| 224 | 20 | <i>Xiwa6509</i>         | 2B | 101.637 | ns  |
| 225 | 21 | <i>Xiwa3127</i>         | 2B | 101.637 | ns  |
| 226 | 22 | <i>Xiwa3126</i>         | 2B | 101.637 | ns  |
| 227 | 23 | <i>Xiwa1763</i>         | 2B | 101.637 | ns  |
| 228 | 24 | <i>Xiwa897</i>          | 2B | 101.637 | ns  |
| 229 | 25 | <i>Xiwa10</i>           | 2B | 104.291 | ns  |
| 230 | 26 | <i>Xiwa3924</i>         | 2B | 104.291 | ns  |
| 231 | 27 | <i>Xiwa4894</i>         | 2B | 104.291 | ns  |
| 232 | 28 | <i>Xiwa6075</i>         | 2B | 106.548 | ns  |

|     |    |                         |    |         |       |
|-----|----|-------------------------|----|---------|-------|
| 233 | 29 | <i>Xiwa4102</i>         | 2B | 106.548 | ns    |
| 234 | 30 | <b><i>Xwmc149.2</i></b> | 2B | 115.836 | ns    |
| 235 | 31 | <i>Xiwa2130</i>         | 2B | 151.361 | ***   |
| 236 | 32 | <i>Xiwa2131</i>         | 2B | 151.361 | ***   |
| 237 | 33 | <i>Xiwa2261</i>         | 2B | 151.361 | ***   |
| 238 | 34 | <i>Xiwa469</i>          | 2B | 151.361 | ***   |
| 239 | 35 | <i>Xiwa5414</i>         | 2B | 151.361 | ***   |
| 240 | 36 | <i>Xiwa4866</i>         | 2B | 179.552 | **    |
| 241 | 37 | <i>Xiwa7996</i>         | 2B | 182.609 | **    |
| 242 | 38 | <i>Xiwa2873</i>         | 2B | 183.712 | ***   |
| 243 | 39 | <i>Xiwa3176</i>         | 2B | 183.712 | ***   |
| 244 | 40 | <i>Xiwa1040</i>         | 2B | 188.019 | ****  |
| 245 | 41 | <i>Xiwa7640</i>         | 2B | 188.019 | ****  |
| 246 | 42 | <i>Xiwa5081</i>         | 2B | 196.003 | ***** |
| 247 | 43 | <i>Xiwa7112</i>         | 2B | 196.003 | ***** |
| 248 | 44 | <i>Xiwa7113</i>         | 2B | 196.003 | ***** |
| 249 | 45 | <i>Xiwa571</i>          | 2B | 196.733 | ***** |
| 250 | 46 | <i>Xiwa8589</i>         | 2B | 196.733 | ***** |

|     |    |                         |    |         |    |
|-----|----|-------------------------|----|---------|----|
| 251 | 1  | <i>Xiwa4257</i>         | 3A | 0       | ns |
| 252 | 2  | <i>Xiwa5969</i>         | 3A | 5.01641 | ns |
| 253 | 3  | <b><i>Xwmc532</i></b>   | 3A | 5.01641 | ns |
| 254 | 4  | <b><i>Xbarc19</i></b>   | 3A | 44.5918 | ns |
| 255 | 5  | <b><i>Xgwm666.1</i></b> | 3A | 44.5918 | ns |
| 256 | 6  | <b><i>Xhbg345</i></b>   | 3A | 59.1157 | ns |
| 257 | 7  | <i>Xiwa8061</i>         | 3A | 70.5862 | ns |
| 258 | 8  | <i>Xiwa7476</i>         | 3A | 70.5862 | ns |
| 259 | 9  | <i>Xiwa6783</i>         | 3A | 70.5862 | ns |
| 260 | 10 | <i>Xiwa6170</i>         | 3A | 70.5862 | ns |
| 261 | 11 | <i>Xiwa7355</i>         | 3A | 70.5862 | ns |
| 262 | 12 | <i>Xiwa5632</i>         | 3A | 70.5862 | ns |
| 263 | 13 | <i>Xiwa4917</i>         | 3A | 70.5862 | ns |
| 264 | 14 | <i>Xiwa3929</i>         | 3A | 70.5862 | ns |
| 265 | 15 | <i>Xiwa3836</i>         | 3A | 70.5862 | ns |
| 266 | 16 | <i>Xiwa3376</i>         | 3A | 70.5862 | ns |
| 267 | 17 | <i>Xiwa2751</i>         | 3A | 70.5862 | ns |
| 268 | 18 | <i>Xiwa2618</i>         | 3A | 70.5862 | ns |
| 269 | 19 | <i>Xiwa1713</i>         | 3A | 70.5862 | ns |
| 270 | 20 | <i>Xiwa1019</i>         | 3A | 70.5862 | ns |
| 271 | 21 | <i>Xiwa234</i>          | 3A | 72.8604 | ns |

|     |    |                        |    |         |    |
|-----|----|------------------------|----|---------|----|
| 272 | 22 | <i>Xiwa4075</i>        | 3A | 72.8604 | ns |
| 273 | 23 | <i>Xiwa8465</i>        | 3A | 73.2253 | ns |
| 274 | 24 | <i>Xiwa1507</i>        | 3A | 75.8995 | ns |
| 275 | 25 | <i>Xiwa1604</i>        | 3A | 75.8995 | ns |
| 276 | 26 | <i>Xiwa1982</i>        | 3A | 75.8995 | ns |
| 277 | 27 | <i>Xiwa2925</i>        | 3A | 75.8995 | ns |
| 278 | 28 | <i>Xiwa3772</i>        | 3A | 75.8995 | ns |
| 279 | 29 | <i>Xiwa7150</i>        | 3A | 75.8995 | ns |
| 280 | 30 | <i>Xiwa7970</i>        | 3A | 75.8995 | ns |
| 281 | 31 | <i>Xiwa2332</i>        | 3A | 75.8995 | ns |
| 282 | 32 | <i>Xiwa3600</i>        | 3A | 75.8995 | ns |
| 283 | 33 | <i>Xiwa3771</i>        | 3A | 75.8995 | ns |
| 284 | 34 | <i>Xiwa4001</i>        | 3A | 75.8995 | ns |
| 285 | 35 | <i>Xiwa6907</i>        | 3A | 75.8995 | ns |
| 286 | 36 | <i>Xiwa7564</i>        | 3A | 75.8995 | ns |
| 287 | 37 | <i>Xiwa7817</i>        | 3A | 75.8995 | ns |
| 288 | 38 | <i>Xiwa7891</i>        | 3A | 75.8995 | ns |
| 289 | 39 | <i>Xiwa3198</i>        | 3A | 79.3933 | ns |
| 290 | 40 | <i>Xiwa6750</i>        | 3A | 79.3933 | ns |
| 291 | 41 | <i>Xiwa7159</i>        | 3A | 79.3933 | ns |
| 292 | 42 | <i>Xiwa7877</i>        | 3A | 79.3933 | ns |
| 293 | 43 | <i>Xiwa2348</i>        | 3A | 99.6186 | ns |
| 294 | 44 | <i>Xiwa5114</i>        | 3A | 99.6186 | ns |
| 295 | 45 | <i>Xiwa5601</i>        | 3A | 99.6186 | ns |
| 296 | 46 | <i>Xiwa5602</i>        | 3A | 99.6186 | ns |
| 297 | 47 | <i>Xiwa5212</i>        | 3A | 124.996 | ns |
| 298 | 48 | <i>Xiwa855</i>         | 3A | 124.996 | ns |
| 299 | 49 | <i>Xiwa3111</i>        | 3A | 124.996 | ns |
| 300 | 50 | <i>Xiwa5980</i>        | 3A | 124.996 | ns |
| 301 | 51 | <i>Xiwa7602</i>        | 3A | 124.996 | ns |
| 302 | 52 | <b><i>Xcfa2037</i></b> | 3A | 157.471 | ns |
| 303 | 53 | <b><i>Xcfa2076</i></b> | 3A | 159.972 | ns |

|     |   |                 |    |         |    |
|-----|---|-----------------|----|---------|----|
| 304 | 1 | <i>Xiwa4796</i> | 3B | 0       | ns |
| 305 | 2 | <i>Xiwa5202</i> | 3B | 1.10306 | ns |
| 306 | 3 | <i>Xiwa7230</i> | 3B | 2.20612 | ns |
| 307 | 4 | <i>Xiwa4801</i> | 3B | 2.20612 | ns |
| 308 | 5 | <i>Xiwa4800</i> | 3B | 2.20612 | ns |
| 309 | 6 | <i>Xiwa5426</i> | 3B | 2.56843 | ns |
| 310 | 7 | <i>Xiwa5106</i> | 3B | 2.56843 | ns |



|     |    |                        |    |         |    |
|-----|----|------------------------|----|---------|----|
| 311 | 8  | <i>Xiwa2908</i>        | 3B | 3.67148 | ns |
| 312 | 9  | <b><i>Xhbe383</i></b>  | 3B | 3.67148 | *  |
| 313 | 10 | <i>Xiwa2037</i>        | 3B | 18.857  | *  |
| 314 | 11 | <i>Xiwa8303</i>        | 3B | 23.1642 | *  |
| 315 | 12 | <i>Xiwa8522</i>        | 3B | 46.3398 | ns |
| 316 | 13 | <i>Xiwa747</i>         | 3B | 48.2062 | ns |
| 317 | 14 | <i>Xiwa6238</i>        | 3B | 50.4633 | ns |
| 318 | 15 | <i>Xiwa5710</i>        | 3B | 82.2308 | ns |
| 319 | 16 | <i>Xiwa8290</i>        | 3B | 82.2308 | ns |
| 320 | 17 | <i>Xiwa4218</i>        | 3B | 82.2308 | ns |
| 321 | 18 | <i>Xiwa8583</i>        | 3B | 82.2308 | ns |
| 322 | 19 | <i>Xiwa7512</i>        | 3B | 82.2308 | ns |
| 323 | 20 | <i>Xiwa3306</i>        | 3B | 82.2308 | ns |
| 324 | 21 | <i>Xiwa3305</i>        | 3B | 82.2308 | ns |
| 325 | 22 | <i>Xiwa3304</i>        | 3B | 82.2308 | ns |
| 326 | 23 | <i>Xiwa5775</i>        | 3B | 82.9661 | *  |
| 327 | 24 | <i>Xiwa4653</i>        | 3B | 82.9661 | *  |
| 328 | 25 | <i>Xiwa3018</i>        | 3B | 83.7014 | *  |
| 329 | 26 | <b><i>Xbarc344</i></b> | 3B | 109.942 | ns |
| 330 | 27 | <i>Xiwa6056</i>        | 3B | 125.655 | *  |
| 331 | 28 | <i>Xiwa6057</i>        | 3B | 125.655 | *  |
| 332 | 29 | <i>Xiwa8354</i>        | 3B | 125.655 | *  |
| 333 | 30 | <b><i>Xbarc84</i></b>  | 3B | 140.347 | ns |
| 334 | 31 | <i>Xiwa3159</i>        | 3B | 159.395 | ns |
| 335 | 32 | <i>Xiwa8479</i>        | 3B | 162.452 | ns |
| 336 | 33 | <i>Xiwa5892</i>        | 3B | 167.19  | ns |
| 337 | 34 | <i>Xiwa8203</i>        | 3B | 167.19  | ns |

|     |    |                        |    |         |    |
|-----|----|------------------------|----|---------|----|
| 338 | 1  | <b><i>Xbarc138</i></b> | 4A | 0       | ns |
| 339 | 2  | <b><i>Xcfd71</i></b>   | 4A | 0       | ns |
| 340 | 3  | <b><i>Xwmc491</i></b>  | 4A | 2.70512 | ns |
| 341 | 4  | <i>Xiwa603</i>         | 4A | 22.9228 | ns |
| 342 | 5  | <i>Xiwa4321</i>        | 4A | 25.1798 | ns |
| 343 | 6  | <i>Xiwa7521</i>        | 4A | 27.454  | ns |
| 344 | 7  | <i>Xiwa7537</i>        | 4A | 27.454  | ns |
| 345 | 8  | <i>Xiwa1320</i>        | 4A | 29.711  | ns |
| 346 | 9  | <i>Xiwa110</i>         | 4A | 33.5946 | ns |
| 347 | 10 | <i>Xiwa115</i>         | 4A | 33.5946 | ns |
| 348 | 11 | <i>Xiwa172</i>         | 4A | 33.5946 | ns |
| 349 | 12 | <i>Xiwa1341</i>        | 4A | 33.5946 | ns |

|     |    |                       |    |         |    |
|-----|----|-----------------------|----|---------|----|
| 350 | 13 | <i>Xiwa2781</i>       | 4A | 33.5946 | ns |
| 351 | 14 | <i>Xiwa3326</i>       | 4A | 33.5946 | ns |
| 352 | 15 | <i>Xiwa3541</i>       | 4A | 33.5946 | ns |
| 353 | 16 | <i>Xiwa3542</i>       | 4A | 33.5946 | ns |
| 354 | 17 | <i>Xiwa3565</i>       | 4A | 33.5946 | ns |
| 355 | 18 | <i>Xiwa3845</i>       | 4A | 33.5946 | ns |
| 356 | 19 | <i>Xiwa5652</i>       | 4A | 33.5946 | ns |
| 357 | 20 | <i>Xiwa5851</i>       | 4A | 33.5946 | ns |
| 358 | 21 | <i>Xiwa5975</i>       | 4A | 33.5946 | ns |
| 359 | 22 | <i>Xiwa6597</i>       | 4A | 33.5946 | ns |
| 360 | 23 | <i>Xiwa7270</i>       | 4A | 33.5946 | ns |
| 361 | 24 | <i>Xiwa7271</i>       | 4A | 33.5946 | ns |
| 362 | 25 | <i>Xiwa8414</i>       | 4A | 33.5946 | ns |
| 363 | 26 | <i>Xiwa1824</i>       | 4A | 33.9569 | ns |
| 364 | 27 | <i>Xiwa8416</i>       | 4A | 37.0139 | ns |
| 365 | 28 | <i>Xiwa232</i>        | 4A | 37.0139 | ns |
| 366 | 29 | <i>Xiwa126</i>        | 4A | 37.0139 | ns |
| 367 | 30 | <i>Xiwa3792</i>       | 4A | 40.071  | ns |
| 368 | 31 | <i>Xiwa2000</i>       | 4A | 40.071  | ns |
| 369 | 32 | <i>Xiwa7859</i>       | 4A | 40.071  | ns |
| 370 | 33 | <i>Xiwa7657</i>       | 4A | 40.071  | ns |
| 371 | 34 | <i>Xiwa7617</i>       | 4A | 40.071  | ns |
| 372 | 35 | <i>Xiwa7522</i>       | 4A | 40.071  | ns |
| 373 | 36 | <i>Xiwa7134</i>       | 4A | 40.071  | ns |
| 374 | 37 | <i>Xiwa7133</i>       | 4A | 40.071  | ns |
| 375 | 38 | <i>Xiwa7092</i>       | 4A | 40.071  | ns |
| 376 | 39 | <i>Xiwa6944</i>       | 4A | 40.071  | ns |
| 377 | 40 | <i>Xiwa6540</i>       | 4A | 40.071  | ns |
| 378 | 41 | <i>Xiwa4772</i>       | 4A | 40.071  | ns |
| 379 | 42 | <i>Xiwa4771</i>       | 4A | 40.071  | ns |
| 380 | 43 | <i>Xiwa3582</i>       | 4A | 40.071  | ns |
| 381 | 44 | <i>Xiwa3581</i>       | 4A | 40.071  | ns |
| 382 | 45 | <i>Xiwa3361</i>       | 4A | 40.071  | ns |
| 383 | 46 | <i>Xiwa3344</i>       | 4A | 40.071  | ns |
| 384 | 47 | <i>Xiwa3088</i>       | 4A | 40.071  | ns |
| 385 | 48 | <i>Xiwa1919</i>       | 4A | 40.071  | ns |
| 386 | 49 | <i>Xiwa109</i>        | 4A | 40.4333 | ns |
| 387 | 50 | <i>Xiwa1720</i>       | 4A | 67.5376 | ns |
| 388 | 51 | <b><i>Xwmc468</i></b> | 4A | 78.1068 | ns |
| 389 | 52 | <i>Xiwa6035</i>       | 4A | 78.1068 | ns |
| 390 | 53 | <i>Xiwa7653</i>       | 4A | 88.6964 | ns |

|     |    |                         |    |         |    |
|-----|----|-------------------------|----|---------|----|
| 391 | 54 | <i>Xbarc170</i>         | 4A | 99.9864 | ns |
| 392 | 55 | <i>Xiwa3068</i>         | 4A | 128.57  | ns |
|     |    |                         |    |         |    |
| 393 | 1  | <i>Xiwa506</i>          | 4B | 0       | ns |
| 394 | 2  | <i>Xiwa2126</i>         | 4B | 7.07107 | ns |
| 395 | 3  | <i>Xiwa4569</i>         | 4B | 9.72492 | ns |
| 396 | 4  | <b><i>Xbarc1045</i></b> | 4B | 44.1718 | ns |
| 397 | 5  | <b><i>Xgwm113</i></b>   | 4B | 45.5234 | ns |
| 398 | 6  | <i>Xiwa7641</i>         | 4B | 48.6522 | ** |
| 399 | 7  | <i>Xiwa58</i>           | 4B | 48.6522 | ** |
| 400 | 8  | <i>Xiwa1007</i>         | 4B | 63.1988 | *  |
| 401 | 9  | <i>Xiwa7752</i>         | 4B | 64.3184 | *  |
| 402 | 10 | <i>Xiwa1035</i>         | 4B | 64.6833 | *  |
| 403 | 11 | <i>Xiwa3396</i>         | 4B | 65.0483 | *  |
| 404 | 12 | <i>Xiwa2031</i>         | 4B | 90.4256 | ns |
| 405 | 13 | <i>Xiwa2595</i>         | 4B | 90.4256 | ns |
| 406 | 14 | <i>Xiwa5408</i>         | 4B | 90.4256 | ns |
| 407 | 15 | <i>Xiwa6465</i>         | 4B | 90.4256 | ns |
| 408 | 16 | <i>Xiwa7766</i>         | 4B | 107.219 | *  |
| 409 | 17 | <i>Xiwa5520</i>         | 4B | 107.949 | *  |
|     |    |                         |    |         |    |
| 410 | 1  | <i>Xiwa4767</i>         | 5A | 0       | ns |
| 411 | 2  | <i>Xiwa4766</i>         | 5A | 0       | ns |
| 412 | 3  | <i>Xiwa4765</i>         | 5A | 0       | ns |
| 413 | 4  | <i>Xiwa8155</i>         | 5A | 13.1371 | ns |
| 414 | 5  | <i>Xiwa8154</i>         | 5A | 13.1371 | ns |
| 415 | 6  | <i>Xiwa6287</i>         | 5A | 13.1371 | ns |
| 416 | 7  | <i>Xiwa3190</i>         | 5A | 13.1371 | ns |
| 417 | 8  | <i>Xiwa7777</i>         | 5A | 17.082  | ns |
| 418 | 9  | <i>Xiwa1301</i>         | 5A | 17.082  | ns |
| 419 | 10 | <i>Xiwa2120</i>         | 5A | 19.3391 | ns |
| 420 | 11 | <i>Xiwa4736</i>         | 5A | 19.3391 | ns |
| 421 | 12 | <i>Xiwa7351</i>         | 5A | 19.7014 | ns |
| 422 | 13 | <i>Xiwa5496</i>         | 5A | 20.0637 | ns |
| 423 | 14 | <i>Xiwa5521</i>         | 5A | 20.0637 | ns |
| 424 | 15 | <i>Xiwa154</i>          | 5A | 20.426  | ns |
| 425 | 16 | <b><i>Xcfa2250</i></b>  | 5A | 21.0509 | ns |
| 426 | 17 | <i>Xiwa3445</i>         | 5A | 21.6759 | ns |
| 427 | 18 | <i>Xiwa333</i>          | 5A | 21.6759 | ns |

|     |    |                          |    |         |       |
|-----|----|--------------------------|----|---------|-------|
| 428 | 19 | <i>Xiwa2480</i>          | 5A | 22.4058 | ns    |
| 429 | 20 | <b><i>Xhbg231.2</i></b>  | 5A | 28.5585 | ns    |
| 430 | 21 | <b><i>Xbarc360</i></b>   | 5A | 31.3778 | ns    |
| 431 | 22 | <i>Xiwa2926</i>          | 5A | 32.5406 | ns    |
| 432 | 23 | <i>Xiwa5528</i>          | 5A | 34.0225 | ns    |
| 433 | 24 | <i>Xiwa5735</i>          | 5A | 36.2795 | ns    |
| 434 | 25 | <i>Xiwa7129</i>          | 5A | 36.6418 | ns    |
| 435 | 26 | <i>Xiwa7130</i>          | 5A | 36.6418 | ns    |
| 436 | 27 | <i>Xiwa3975</i>          | 5A | 38.1236 | ns    |
| 437 | 28 | <i>Xiwa5539</i>          | 5A | 38.1236 | ns    |
| 438 | 29 | <i>Xiwa7596</i>          | 5A | 38.1236 | ns    |
| 439 | 30 | <i>Xiwa7597</i>          | 5A | 38.1236 | ns    |
| 440 | 31 | <i>Xiwa7598</i>          | 5A | 38.1236 | ns    |
| 441 | 32 | <i>Xiwa1486</i>          | 5A | 64.1864 | *     |
| 442 | 33 | <i>Xiwa4648</i>          | 5A | 64.1864 | *     |
| 443 | 34 | <i>Xiwa2014</i>          | 5A | 65.2894 | **    |
| 444 | 35 | <b><i>Xhbg247</i></b>    | 5A | 73.424  | ***** |
| 445 | 36 | <i>Xiwa2350</i>          | 5A | 82.8745 | ***** |
| 446 | 37 | <i>Xiwa4448</i>          | 5A | 82.8745 | ***** |
| 447 | 38 | <i>Xiwa4449</i>          | 5A | 82.8745 | ***** |
| 448 | 39 | <i>Xiwa7255</i>          | 5A | 82.8745 | ***** |
| 449 | 40 | <i>Xiwa7256</i>          | 5A | 82.8745 | ***** |
| 450 | 41 | <i>Xiwa5040</i>          | 5A | 83.6044 | ***** |
| 451 | 42 | <i>Xiwa509</i>           | 5A | 85.0863 | ***** |
| 452 | 43 | <i>Xiwa3705</i>          | 5A | 88.9698 | ***** |
| 453 | 44 | <b><i>Xbarc142.2</i></b> | 5A | 90.7722 | ***** |
| 454 | 45 | <i>Xiwa3623</i>          | 5A | 93.0463 | ***** |
| 455 | 46 | <i>Xiwa583</i>           | 5A | 93.4113 | ***** |
| 456 | 47 | <i>Xiwa582</i>           | 5A | 93.4113 | ***** |
| 457 | 48 | <b><i>Xcfa2141</i></b>   | 5A | 93.9607 | ***** |
| 458 | 49 | <i>Xiwa2113</i>          | 5A | 113.559 | ****  |
| 459 | 50 | <i>Xiwa2856</i>          | 5A | 113.559 | ****  |
| 460 | 51 | <i>Xiwa2857</i>          | 5A | 113.559 | ****  |
| 461 | 52 | <i>Xiwa2858</i>          | 5A | 113.559 | ****  |
| 462 | 53 | <i>Xiwa2859</i>          | 5A | 113.559 | ****  |
| 463 | 54 | <i>Xiwa4238</i>          | 5A | 113.559 | ****  |
| 464 | 55 | <i>Xiwa7009</i>          | 5A | 113.559 | ****  |
| 465 | 56 | <i>Xiwa7568</i>          | 5A | 121.542 | *     |
| 466 | 57 | <i>Xiwa1670</i>          | 5A | 122.272 | *     |
| 467 | 58 | <i>Xiwa7880</i>          | 5A | 130.755 | ns    |

|     |    |                         |    |         |       |
|-----|----|-------------------------|----|---------|-------|
| 468 | 1  | <i>Xgwm234</i>          | 5B | 0       | ***   |
| 469 | 2  | <i>Xiwa757</i>          | 5B | 2.83296 | ***** |
| 470 | 3  | <i>Xiwa868</i>          | 5B | 2.83296 | ***** |
| 471 | 4  | <i>Xiwa3606</i>         | 5B | 8.45618 | ***** |
| 472 | 5  | <i>Xiwa3607</i>         | 5B | 8.45618 | ***** |
| 473 | 6  | <i>Xiwa332</i>          | 5B | 13.1944 | ****  |
| 474 | 7  | <i>Xiwa420</i>          | 5B | 13.1944 | ****  |
| 475 | 8  | <b><i>Xwmc149.1</i></b> | 5B | 17.0478 | *     |
| 476 | 9  | <b><i>Xbarc4</i></b>    | 5B | 29.358  | ***   |
| 477 | 10 | <b><i>Xgwm544</i></b>   | 5B | 29.8387 | **    |
| 478 | 11 | <b><i>Xwmc73</i></b>    | 5B | 31.2953 | **    |
| 479 | 12 | <i>Xiwa7613</i>         | 5B | 35.0758 | **    |
| 480 | 13 | <i>Xiwa6846</i>         | 5B | 35.0758 | **    |
| 481 | 14 | <b><i>Xhbe478</i></b>   | 5B | 40.4884 | ***   |
| 482 | 15 | <b><i>Xbarc216</i></b>  | 5B | 40.4884 | ***   |
| 483 | 16 | <i>Xiwa1342</i>         | 5B | 41.3975 | ****  |
| 484 | 17 | <i>Xiwa1965</i>         | 5B | 41.3975 | ****  |
| 485 | 18 | <i>Xiwa4377</i>         | 5B | 41.7599 | ****  |
| 486 | 19 | <i>Xiwa6816</i>         | 5B | 41.7599 | ****  |
| 487 | 20 | <i>Xiwa6521</i>         | 5B | 41.7599 | ****  |
| 488 | 21 | <i>Xiwa5494</i>         | 5B | 41.7599 | ****  |
| 489 | 22 | <i>Xiwa5079</i>         | 5B | 41.7599 | ****  |
| 490 | 23 | <i>Xiwa4378</i>         | 5B | 41.7599 | ****  |
| 491 | 24 | <i>Xiwa1176</i>         | 5B | 41.7599 | ****  |
| 492 | 25 | <i>Xiwa7857</i>         | 5B | 42.4898 | ***   |
| 493 | 26 | <i>Xiwa6568</i>         | 5B | 42.4898 | ***   |
| 494 | 27 | <i>Xiwa6567</i>         | 5B | 42.4898 | ***   |
| 495 | 28 | <i>Xiwa6447</i>         | 5B | 42.4898 | ***   |
| 496 | 29 | <i>Xiwa6429</i>         | 5B | 42.4898 | ***   |
| 497 | 30 | <i>Xiwa5334</i>         | 5B | 42.4898 | ***   |
| 498 | 31 | <i>Xiwa4708</i>         | 5B | 42.4898 | ***   |
| 499 | 32 | <i>Xiwa4686</i>         | 5B | 42.4898 | ***   |
| 500 | 33 | <i>Xiwa894</i>          | 5B | 42.4898 | ***   |
| 501 | 34 | <i>Xiwa620</i>          | 5B | 42.4898 | ***   |
| 502 | 35 | <i>Xiwa3870</i>         | 5B | 43.5929 | ***   |
| 503 | 36 | <b><i>Xhbg279.1</i></b> | 5B | 45.4984 | **    |
| 504 | 37 | <b><i>Xgwm213</i></b>   | 5B | 52.2804 | ***   |
| 505 | 38 | <b><i>Xbarc74</i></b>   | 5B | 53.2905 | *     |
| 506 | 39 | <b><i>Xhbg231.1</i></b> | 5B | 53.2905 | *     |
| 507 | 40 | <i>Xiwa7227</i>         | 5B | 55.196  | **    |

|     |    |                       |    |         |    |
|-----|----|-----------------------|----|---------|----|
| 508 | 41 | <i>Xiwa6689</i>       | 5B | 55.196  | ** |
| 509 | 42 | <i>Xiwa6526</i>       | 5B | 55.196  | ** |
| 510 | 43 | <i>Xiwa5280</i>       | 5B | 55.196  | ** |
| 511 | 44 | <i>Xiwa5279</i>       | 5B | 55.196  | ** |
| 512 | 45 | <i>Xiwa303</i>        | 5B | 55.196  | ** |
| 513 | 46 | <i>Xiwa4422</i>       | 5B | 55.9259 | *  |
| 514 | 47 | <i>Xiwa8603</i>       | 5B | 57.4078 | ns |
| 515 | 48 | <i>Xiwa5742</i>       | 5B | 59.6648 | *  |
| 516 | 49 | <b><i>Xgwm371</i></b> | 5B | 69.3578 | ** |
| 517 | 50 | <i>Xiwa6638</i>       | 5B | 74.8245 | ** |
| 518 | 51 | <i>Xiwa5486</i>       | 5B | 74.8245 | ** |
| 519 | 52 | <i>Xiwa5331</i>       | 5B | 74.8245 | ** |
| 520 | 53 | <i>Xiwa3436</i>       | 5B | 74.8245 | ** |
| 521 | 54 | <i>Xiwa1380</i>       | 5B | 74.8245 | ** |
| 522 | 55 | <i>Xiwa2536</i>       | 5B | 75.9357 | *  |
| 523 | 56 | <i>Xiwa6867</i>       | 5B | 79.0163 | ** |
| 524 | 57 | <i>Xiwa6468</i>       | 5B | 79.0163 | ** |
| 525 | 58 | <i>Xiwa6383</i>       | 5B | 79.0163 | ** |
| 526 | 59 | <i>Xiwa5283</i>       | 5B | 79.0163 | ** |
| 527 | 60 | <i>Xiwa4074</i>       | 5B | 79.0163 | ** |
| 528 | 61 | <i>Xiwa3985</i>       | 5B | 79.0163 | ** |
| 529 | 62 | <i>Xiwa2455</i>       | 5B | 79.0163 | ** |
| 530 | 63 | <i>Xiwa2454</i>       | 5B | 79.0163 | ** |
| 531 | 64 | <i>Xiwa2453</i>       | 5B | 79.0163 | ** |
| 532 | 65 | <i>Xiwa7795</i>       | 5B | 79.3786 | ** |
| 533 | 66 | <i>Xiwa265</i>        | 5B | 79.3786 | ** |
| 534 | 67 | <b><i>Xgwm499</i></b> | 5B | 80.3888 | ** |
| 535 | 68 | <i>Xiwa7776</i>       | 5B | 97.4679 | ns |
| 536 | 69 | <i>Xiwa5214</i>       | 5B | 102.645 | ns |
| 537 | 70 | <i>Xiwa7024</i>       | 5B | 116.769 | ns |
| 538 | 71 | <b><i>Tsn1</i></b>    | 5B | 117.169 | ns |
| 539 | 72 | <i>Xiwa6915</i>       | 5B | 117.976 | ns |
| 540 | 73 | <i>Xiwa8375</i>       | 5B | 119.842 | ns |
| 541 | 74 | <i>Xiwa2306</i>       | 5B | 119.842 | ns |
| 542 | 75 | <i>Xiwa3002</i>       | 5B | 120.945 | ns |
| 543 | 76 | <i>Xiwa2255</i>       | 5B | 122.427 | ns |
| 544 | 77 | <i>Xiwa2565</i>       | 5B | 122.427 | ns |
| 545 | 78 | <i>Xiwa6024</i>       | 5B | 122.427 | ns |
| 546 | 79 | <i>Xiwa6671</i>       | 5B | 122.427 | ns |
| 547 | 80 | <i>Xiwa1775</i>       | 5B | 122.427 | ns |
| 548 | 81 | <i>Xiwa3226</i>       | 5B | 122.789 | ns |

|     |     |                   |    |         |    |
|-----|-----|-------------------|----|---------|----|
| 549 | 82  | <b>Xgwm408</b>    | 5B | 127.004 | ns |
| 550 | 83  | <i>Xiwa2500</i>   | 5B | 141.87  | ns |
| 551 | 84  | <b>Xgwm604</b>    | 5B | 143.625 | ns |
| 552 | 85  | <b>Xhbg399</b>    | 5B | 145.92  | ns |
| 553 | 86  | <b>Xbarc142.1</b> | 5B | 147.284 | ns |
| 554 | 87  | <i>Xiwa7872</i>   | 5B | 148.6   | ns |
| 555 | 88  | <i>Xiwa7478</i>   | 5B | 148.6   | ns |
| 556 | 89  | <i>Xiwa4539</i>   | 5B | 148.6   | ns |
| 557 | 90  | <i>Xiwa6779</i>   | 5B | 152.067 | ns |
| 558 | 91  | <i>Xiwa8250</i>   | 5B | 152.067 | ns |
| 559 | 92  | <b>Xwmc160</b>    | 5B | 153.837 | ns |
| 560 | 93  | <b>Xbarc232</b>   | 5B | 154.746 | ns |
| 561 | 94  | <b>Xwmc235.1</b>  | 5B | 158.287 | ns |
| 562 | 95  | <i>Xiwa7966</i>   | 5B | 160.647 | ns |
| 563 | 96  | <i>Xiwa2388</i>   | 5B | 160.647 | ns |
| 564 | 97  | <i>Xiwa7965</i>   | 5B | 160.647 | ns |
| 565 | 98  | <b>Xhbg429</b>    | 5B | 179.084 | ** |
| 566 | 99  | <i>Xiwa3972</i>   | 5B | 180.887 | *  |
| 567 | 100 | <i>Xiwa6393</i>   | 5B | 180.887 | *  |
| 568 | 101 | <b>Xwmc640</b>    | 5B | 185.354 | ** |
| 569 | 102 | <b>Xbarc243</b>   | 5B | 203.623 | ** |
| 570 | 103 | <i>Xiwa3658</i>   | 5B | 210.598 | ns |
| 571 | 104 | <i>Xiwa2093</i>   | 5B | 211.717 | ns |

|     |    |                 |    |         |    |
|-----|----|-----------------|----|---------|----|
| 572 | 1  | <b>Xhbe297</b>  | 6A | 0       | ns |
| 573 | 2  | <b>Xmag1885</b> | 6A | 34.1604 | ** |
| 574 | 3  | <i>Xiwa7572</i> | 6A | 73.9446 | ns |
| 575 | 4  | <i>Xiwa6853</i> | 6A | 73.9446 | ns |
| 576 | 5  | <i>Xiwa6116</i> | 6A | 73.9446 | ns |
| 577 | 6  | <i>Xiwa4603</i> | 6A | 73.9446 | ns |
| 578 | 7  | <i>Xiwa4602</i> | 6A | 73.9446 | ns |
| 579 | 8  | <i>Xiwa504</i>  | 6A | 73.9446 | ns |
| 580 | 9  | <i>Xiwa3488</i> | 6A | 76.2016 | ns |
| 581 | 10 | <i>Xiwa8568</i> | 6A | 76.2016 | ns |
| 582 | 11 | <i>Xiwa6858</i> | 6A | 76.2016 | ns |
| 583 | 12 | <i>Xiwa4478</i> | 6A | 76.2016 | ns |
| 584 | 13 | <i>Xiwa3487</i> | 6A | 76.2016 | ns |
| 585 | 14 | <i>Xiwa2481</i> | 6A | 77.6835 | ns |
| 586 | 15 | <i>Xiwa8602</i> | 6A | 87.1977 | ** |
| 587 | 16 | <i>Xiwa20</i>   | 6A | 93.7383 | ns |

|     |    |                       |    |         |    |
|-----|----|-----------------------|----|---------|----|
| 588 | 17 | <i>Xiwa19</i>         | 6A | 93.7383 | ns |
| 589 | 18 | <b><i>Xhbg416</i></b> | 6A | 116.334 | ns |
| 590 | 19 | <i>Xiwa399</i>        | 6A | 118.945 | ns |
| 591 | 20 | <i>Xiwa8592</i>       | 6A | 119.307 | ns |
| 592 | 21 | <i>Xiwa6288</i>       | 6A | 120.41  | ns |
| 593 | 22 | <i>Xiwa6247</i>       | 6A | 120.41  | ns |
| 594 | 23 | <i>Xiwa6033</i>       | 6A | 120.41  | ns |
| 595 | 24 | <i>Xiwa6012</i>       | 6A | 120.41  | ns |
| 596 | 25 | <i>Xiwa664</i>        | 6A | 120.772 | ns |
| 597 | 26 | <i>Xiwa4865</i>       | 6A | 121.876 | ns |
| 598 | 27 | <i>Xiwa6596</i>       | 6A | 121.876 | ns |
| 599 | 28 | <i>Xiwa6699</i>       | 6A | 121.876 | ns |
| 600 | 29 | <i>Xiwa2895</i>       | 6A | 121.876 | ns |
| 601 | 30 | <i>Xiwa4036</i>       | 6A | 121.876 | ns |
| 602 | 31 | <i>Xiwa4035</i>       | 6A | 121.876 | ns |
| 603 | 32 | <i>Xiwa2192</i>       | 6A | 121.876 | ns |
| 604 | 33 | <i>Xiwa1514</i>       | 6A | 121.876 | ns |
| 605 | 34 | <i>Xiwa1475</i>       | 6A | 121.876 | ns |
| 606 | 35 | <i>Xiwa1474</i>       | 6A | 121.876 | ns |
| 607 | 36 | <i>Xiwa1194</i>       | 6A | 121.876 | ns |
| 608 | 37 | <i>Xiwa741</i>        | 6A | 121.876 | ns |
| 609 | 38 | <i>Xiwa651</i>        | 6A | 121.876 | ns |
| 610 | 39 | <i>Xiwa650</i>        | 6A | 121.876 | ns |
| 611 | 40 | <i>Xiwa218</i>        | 6A | 121.876 | ns |
| 612 | 41 | <i>Xiwa4928</i>       | 6A | 121.876 | ns |
| 613 | 42 | <i>Xiwa1671</i>       | 6A | 121.876 | ns |
| 614 | 43 | <i>Xiwa1235</i>       | 6A | 121.876 | ns |
| 615 | 44 | <i>Xiwa4929</i>       | 6A | 121.876 | ns |
| 616 | 45 | <i>Xiwa8585</i>       | 6A | 122.611 | ns |
| 617 | 46 | <i>Xiwa7052</i>       | 6A | 123.341 | ns |

|     |   |                      |    |         |     |
|-----|---|----------------------|----|---------|-----|
| 618 | 1 | <i>Xiwa1254</i>      | 6B | 0       | ns  |
| 619 | 2 | <i>Xiwa8314</i>      | 6B | 0.72994 | ns  |
| 620 | 3 | <i>Xiwa4633</i>      | 6B | 4.61346 | ns  |
| 621 | 4 | <i>Xiwa7725</i>      | 6B | 20.0366 | **  |
| 622 | 5 | <i>Xiwa52</i>        | 6B | 23.5035 | *   |
| 623 | 6 | <b><i>Xcfd13</i></b> | 6B | 24.5788 | *** |
| 624 | 7 | <i>Xiwa3229</i>      | 6B | 26.7778 | **  |
| 625 | 8 | <i>Xiwa7239</i>      | 6B | 45.7779 | ns  |
| 626 | 9 | <i>Xiwa861</i>       | 6B | 45.7779 | ns  |



|     |    |                 |    |         |    |
|-----|----|-----------------|----|---------|----|
| 627 | 10 | <i>Xiwa8134</i> | 6B | 48.0349 | *  |
| 628 | 11 | <i>Xiwa5888</i> | 6B | 48.0349 | *  |
| 629 | 12 | <i>Xiwa3411</i> | 6B | 48.0349 | *  |
| 630 | 13 | <i>Xiwa3410</i> | 6B | 48.0349 | *  |
| 631 | 14 | <i>Xiwa7808</i> | 6B | 49.5168 | *  |
| 632 | 15 | <i>Xiwa7810</i> | 6B | 49.5168 | *  |
| 633 | 16 | <i>Xiwa7809</i> | 6B | 49.5168 | *  |
| 634 | 17 | <i>Xiwa7807</i> | 6B | 49.5168 | *  |
| 635 | 18 | <i>Xiwa7618</i> | 6B | 49.5168 | *  |
| 636 | 19 | <i>Xiwa2219</i> | 6B | 49.5168 | *  |
| 637 | 20 | <i>Xiwa5056</i> | 6B | 50.2467 | *  |
| 638 | 21 | <i>Xiwa5055</i> | 6B | 50.2467 | *  |
| 639 | 22 | <i>Xiwa7937</i> | 6B | 53.7136 | *  |
| 640 | 23 | <i>Xiwa7689</i> | 6B | 53.7136 | *  |
| 641 | 24 | <i>Xiwa3501</i> | 6B | 53.7136 | *  |
| 642 | 25 | <i>Xiwa7897</i> | 6B | 54.4435 | ns |
| 643 | 26 | <i>Xiwa7896</i> | 6B | 54.4435 | ns |
| 644 | 27 | <i>Xiwa2307</i> | 6B | 54.4435 | ns |
| 645 | 28 | <i>Xiwa8011</i> | 6B | 59.6621 | ** |
| 646 | 29 | <i>Xiwa4078</i> | 6B | 59.6621 | ** |
| 647 | 30 | <i>Xiwa7676</i> | 6B | 60.7651 | ** |
| 648 | 31 | <i>Xiwa7783</i> | 6B | 60.7651 | ** |
| 649 | 32 | <i>Xiwa7401</i> | 6B | 60.7651 | ** |
| 650 | 33 | <i>Xiwa6293</i> | 6B | 60.7651 | ** |
| 651 | 34 | <i>Xiwa5748</i> | 6B | 60.7651 | ** |
| 652 | 35 | <i>Xiwa4515</i> | 6B | 60.7651 | ** |
| 653 | 36 | <i>Xiwa4065</i> | 6B | 60.7651 | ** |
| 654 | 37 | <i>Xiwa3971</i> | 6B | 60.7651 | ** |
| 655 | 38 | <i>Xiwa2451</i> | 6B | 60.7651 | ** |
| 656 | 39 | <i>Xiwa1742</i> | 6B | 60.7651 | ** |
| 657 | 40 | <i>Xiwa1545</i> | 6B | 60.7651 | ** |
| 658 | 41 | <i>Xiwa685</i>  | 6B | 60.7651 | ** |
| 659 | 42 | <i>Xiwa4986</i> | 6B | 60.7651 | ** |
| 660 | 43 | <i>Xiwa6153</i> | 6B | 61.8682 | *  |
| 661 | 44 | <i>Xiwa5504</i> | 6B | 61.8682 | *  |
| 662 | 45 | <i>Xiwa5102</i> | 6B | 61.8682 | *  |
| 663 | 46 | <i>Xiwa5029</i> | 6B | 61.8682 | *  |
| 664 | 47 | <i>Xiwa3917</i> | 6B | 61.8682 | *  |
| 665 | 48 | <i>Xiwa2780</i> | 6B | 61.8682 | *  |
| 666 | 49 | <i>Xiwa1839</i> | 6B | 61.8682 | *  |
| 667 | 50 | <i>Xiwa1838</i> | 6B | 61.8682 | *  |

|     |    |                        |    |         |    |
|-----|----|------------------------|----|---------|----|
| 668 | 51 | <i>Xiwa3652</i>        | 6B | 62.2331 | *  |
| 669 | 52 | <i>Xiwa3797</i>        | 6B | 62.2331 | *  |
| 670 | 53 | <i>Xiwa4169</i>        | 6B | 62.2331 | *  |
| 671 | 54 | <i>Xiwa4848</i>        | 6B | 62.2331 | *  |
| 672 | 55 | <i>Xiwa4924</i>        | 6B | 62.2331 | *  |
| 673 | 56 | <i>Xiwa5966</i>        | 6B | 62.2331 | *  |
| 674 | 57 | <i>Xiwa6101</i>        | 6B | 62.2331 | *  |
| 675 | 58 | <i>Xiwa4170</i>        | 6B | 62.2331 | *  |
| 676 | 59 | <i>Xiwa3459</i>        | 6B | 62.9631 | ns |
| 677 | 60 | <i>Xiwa8165</i>        | 6B | 62.9631 | ns |
| 678 | 61 | <i>Xiwa5345</i>        | 6B | 62.9631 | ns |
| 679 | 62 | <b><i>Xhbg291</i></b>  | 6B | 63.3941 | ns |
| 680 | 63 | <b><i>Xgwm88</i></b>   | 6B | 64.0038 | *  |
| 681 | 64 | <b><i>Xgwm193</i></b>  | 6B | 64.0038 | *  |
| 682 | 65 | <i>Xiwa4484</i>        | 6B | 72.5862 | ns |
| 683 | 66 | <i>Xiwa4485</i>        | 6B | 72.5862 | ns |
| 684 | 67 | <i>Xiwa5722</i>        | 6B | 73.6974 | ns |
| 685 | 68 | <i>Xiwa6329</i>        | 6B | 74.0597 | ns |
| 686 | 69 | <i>Xiwa6660</i>        | 6B | 74.0597 | ns |
| 687 | 70 | <b><i>Xbarc354</i></b> | 6B | 76.5617 | ns |
| 688 | 71 | <b><i>Xbarc79</i></b>  | 6B | 81.3376 | ns |
| 689 | 72 | <i>Xiwa457</i>         | 6B | 82.2148 | ns |
| 690 | 73 | <i>Xiwa3967</i>        | 6B | 83.3179 | ns |
| 691 | 74 | <i>Xiwa6599</i>        | 6B | 83.3179 | ns |
| 692 | 75 | <i>Xiwa5170</i>        | 6B | 83.3179 | ns |
| 693 | 76 | <i>Xiwa1473</i>        | 6B | 83.3179 | ns |
| 694 | 77 | <i>Xiwa1472</i>        | 6B | 83.3179 | ns |
| 695 | 78 | <i>Xiwa4202</i>        | 6B | 83.6802 | ns |
| 696 | 79 | <i>Xiwa3769</i>        | 6B | 83.6802 | ns |
| 697 | 80 | <i>Xiwa1531</i>        | 6B | 83.6802 | ns |
| 698 | 81 | <i>Xiwa225</i>         | 6B | 84.4101 | ns |
| 699 | 82 | <i>Xiwa2346</i>        | 6B | 84.4101 | ns |
| 700 | 83 | <i>Xiwa8566</i>        | 6B | 84.4101 | ns |
| 701 | 84 | <i>Xiwa2347</i>        | 6B | 84.4101 | ns |
| 702 | 85 | <i>Xiwa3636</i>        | 6B | 84.7724 | ns |
| 703 | 86 | <i>Xiwa221</i>         | 6B | 85.1374 | ns |
| 704 | 87 | <i>Xiwa4337</i>        | 6B | 85.1374 | ns |
| 705 | 88 | <i>Xiwa4959</i>        | 6B | 85.1374 | ns |
| 706 | 89 | <i>Xiwa5148</i>        | 6B | 85.1374 | ns |
| 707 | 90 | <i>Xiwa967</i>         | 6B | 104.137 | ns |
| 708 | 91 | <i>Xiwa1629</i>        | 6B | 108.876 | ns |

|     |    |                       |    |         |    |
|-----|----|-----------------------|----|---------|----|
| 709 | 92 | <i>Xiwa1628</i>       | 6B | 108.876 | ns |
| 710 | 93 | <i>Xiwa405</i>        | 6B | 108.876 | ns |
| 711 | 94 | <i>Xiwa404</i>        | 6B | 108.876 | ns |
| 712 | 95 | <b><i>Xgwm219</i></b> | 6B | 111.099 | ns |

|     |    |                        |    |         |    |
|-----|----|------------------------|----|---------|----|
| 713 | 1  | <i>Xiwa7500</i>        | 7A | 0       | ns |
| 714 | 2  | <i>Xiwa6331</i>        | 7A | 8.9934  | ns |
| 715 | 3  | <i>Xiwa679</i>         | 7A | 8.9934  | ns |
| 716 | 4  | <i>Xiwa8390</i>        | 7A | 32.169  | ns |
| 717 | 5  | <i>Xiwa954</i>         | 7A | 41.1624 | ns |
| 718 | 6  | <b><i>Xcfa2049</i></b> | 7A | 42.339  | ns |
| 719 | 7  | <i>Xiwa3505</i>        | 7A | 47.4188 | ns |
| 720 | 8  | <b><i>Xhbg469</i></b>  | 7A | 53.8256 | ns |
| 721 | 9  | <b><i>Xhbg238</i></b>  | 7A | 80.83   | ns |
| 722 | 10 | <i>Xiwa7472</i>        | 7A | 109.985 | ns |
| 723 | 11 | <i>Xiwa7724</i>        | 7A | 109.985 | ns |
| 724 | 12 | <i>Xiwa7792</i>        | 7A | 109.985 | ns |
| 725 | 13 | <i>Xiwa7990</i>        | 7A | 109.985 | ns |
| 726 | 14 | <i>Xiwa8171</i>        | 7A | 109.985 | ns |
| 727 | 15 | <i>Xiwa1477</i>        | 7A | 110.347 | ns |
| 728 | 16 | <i>Xiwa8073</i>        | 7A | 122.642 | ns |
| 729 | 17 | <i>Xiwa7090</i>        | 7A | 124.508 | ns |
| 730 | 18 | <i>Xiwa448</i>         | 7A | 124.871 | ns |
| 731 | 19 | <i>Xiwa4996</i>        | 7A | 124.871 | ns |
| 732 | 20 | <i>Xiwa689</i>         | 7A | 125.233 | ns |
| 733 | 21 | <i>Xiwa808</i>         | 7A | 125.233 | ns |
| 734 | 22 | <i>Xiwa1502</i>        | 7A | 125.233 | ns |
| 735 | 23 | <i>Xiwa2385</i>        | 7A | 125.233 | ns |
| 736 | 24 | <i>Xiwa2386</i>        | 7A | 125.233 | ns |
| 737 | 25 | <i>Xiwa2387</i>        | 7A | 125.233 | ns |
| 738 | 26 | <i>Xiwa2437</i>        | 7A | 125.233 | ns |
| 739 | 27 | <i>Xiwa4062</i>        | 7A | 125.233 | ns |
| 740 | 28 | <i>Xiwa1277</i>        | 7A | 142.026 | ns |
| 741 | 29 | <i>Xiwa3863</i>        | 7A | 142.026 | ns |
| 742 | 30 | <i>Xiwa6124</i>        | 7A | 142.026 | ns |
| 743 | 31 | <i>Xiwa7554</i>        | 7A | 142.026 | ns |
| 744 | 32 | <i>Xiwa8066</i>        | 7A | 142.026 | ns |
| 745 | 33 | <i>Xiwa788</i>         | 7A | 143.129 | ns |
| 746 | 34 | <i>Xiwa1418</i>        | 7A | 143.129 | ns |
| 747 | 35 | <i>Xiwa1871</i>        | 7A | 143.129 | ns |

|     |    |                        |    |         |    |
|-----|----|------------------------|----|---------|----|
| 748 | 36 | <i>Xiwa2381</i>        | 7A | 143.129 | ns |
| 749 | 37 | <i>Xiwa2954</i>        | 7A | 143.129 | ns |
| 750 | 38 | <i>Xiwa3693</i>        | 7A | 143.129 | ns |
| 751 | 39 | <i>Xiwa3694</i>        | 7A | 143.129 | ns |
| 752 | 40 | <i>Xiwa4818</i>        | 7A | 143.129 | ns |
| 753 | 41 | <i>Xiwa6183</i>        | 7A | 143.129 | ns |
| 754 | 42 | <i>Xiwa4411</i>        | 7A | 159.228 | ns |
| 755 | 43 | <i>Xiwa4672</i>        | 7A | 159.228 | ns |
| 756 | 44 | <i>Xiwa4735</i>        | 7A | 159.228 | ns |
| 757 | 45 | <i>Xiwa4817</i>        | 7A | 159.228 | ns |
| 758 | 46 | <i>Xiwa5526</i>        | 7A | 159.228 | ns |
| 759 | 47 | <i>Xiwa7650</i>        | 7A | 159.228 | ns |
| 760 | 48 | <i>Xiwa7651</i>        | 7A | 159.228 | ns |
| 761 | 49 | <i>Xiwa7770</i>        | 7A | 159.228 | ns |
| 762 | 50 | <i>Xiwa7917</i>        | 7A | 159.228 | ns |
| 763 | 51 | <i>Xiwa8115</i>        | 7A | 159.228 | ns |
| 764 | 52 | <i>Xiwa8248</i>        | 7A | 159.228 | ns |
| 765 | 53 | <i>Xiwa2176</i>        | 7A | 159.228 | ns |
| 766 | 54 | <i>Xiwa6940</i>        | 7A | 159.59  | ns |
| 767 | 55 | <i>Xiwa2011</i>        | 7A | 165.214 | ns |
| 768 | 56 | <i>Xiwa2012</i>        | 7A | 165.214 | ns |
| 769 | 57 | <i>Xiwa4288</i>        | 7A | 165.214 | ns |
| 770 | 58 | <i>Xiwa614</i>         | 7A | 180.792 | ns |
| 771 | 59 | <i>Xiwa2775</i>        | 7A | 180.792 | ns |
| 772 | 60 | <i>Xiwa2776</i>        | 7A | 180.792 | ns |
| 773 | 61 | <i>Xiwa5489</i>        | 7A | 180.792 | ns |
| 774 | 62 | <b><i>Xcfa2123</i></b> | 7A | 180.792 | ns |
| 775 | 63 | <i>Xiwa1424</i>        | 7A | 184.968 | ns |
| 776 | 64 | <i>Xiwa1425</i>        | 7A | 184.968 | ns |
| 777 | 65 | <i>Xiwa1724</i>        | 7A | 184.968 | ns |
| 778 | 66 | <i>Xiwa1726</i>        | 7A | 184.968 | ns |
| 779 | 67 | <i>Xiwa5790</i>        | 7A | 184.968 | ns |
| 780 | 68 | <i>Xiwa6715</i>        | 7A | 184.968 | ns |
| 781 | 69 | <i>Xiwa7046</i>        | 7A | 184.968 | ns |
| 782 | 70 | <b><i>Xcfd20.1</i></b> | 7A | 223.85  | ns |
| 783 | 71 | <b><i>Xhbg234</i></b>  | 7A | 256.007 | ns |
| 784 | 72 | <i>Xiwa7409</i>        | 7A | 262.405 | ns |

|     |   |                 |    |   |    |
|-----|---|-----------------|----|---|----|
| 785 | 1 | <i>Xiwa1526</i> | 7B | 0 | ** |
| 786 | 2 | <i>Xiwa783</i>  | 7B | 0 | ** |

|     |    |                       |    |         |    |
|-----|----|-----------------------|----|---------|----|
| 787 | 3  | <i>Xiwa1181</i>       | 7B | 0       | ** |
| 788 | 4  | <b><i>Xgwm537</i></b> | 7B | 16.704  | *  |
| 789 | 5  | <i>Xiwa7233</i>       | 7B | 27.7015 | ns |
| 790 | 6  | <i>Xiwa3572</i>       | 7B | 27.7015 | ns |
| 791 | 7  | <i>Xiwa3508</i>       | 7B | 27.7015 | ns |
| 792 | 8  | <i>Xiwa3507</i>       | 7B | 27.7015 | ns |
| 793 | 9  | <i>Xiwa518</i>        | 7B | 27.7015 | ns |
| 794 | 10 | <i>Xiwa5566</i>       | 7B | 29.582  | ns |
| 795 | 11 | <i>Xiwa5565</i>       | 7B | 29.582  | ns |
| 796 | 12 | <i>Xiwa3958</i>       | 7B | 29.582  | ns |
| 797 | 13 | <i>Xiwa2832</i>       | 7B | 29.582  | ns |
| 798 | 14 | <i>Xiwa3959</i>       | 7B | 29.582  | ns |
| 799 | 15 | <i>Xiwa4873</i>       | 7B | 46.3752 | ns |
| 800 | 16 | <i>Xiwa3121</i>       | 7B | 49.8421 | ns |
| 801 | 17 | <i>Xiwa5210</i>       | 7B | 49.8421 | ns |
| 802 | 18 | <i>Xiwa5661</i>       | 7B | 49.8421 | ns |
| 803 | 19 | <i>Xiwa7846</i>       | 7B | 49.8421 | ns |
| 804 | 20 | <i>Xiwa7831</i>       | 7B | 49.8421 | ns |
| 805 | 21 | <i>Xiwa7830</i>       | 7B | 49.8421 | ns |
| 806 | 22 | <i>Xiwa6788</i>       | 7B | 49.8421 | ns |
| 807 | 23 | <i>Xiwa5663</i>       | 7B | 49.8421 | ns |
| 808 | 24 | <i>Xiwa5662</i>       | 7B | 49.8421 | ns |
| 809 | 25 | <i>Xiwa3663</i>       | 7B | 49.8421 | ns |
| 810 | 26 | <i>Xiwa8233</i>       | 7B | 51.3239 | ns |
| 811 | 27 | <i>Xiwa6401</i>       | 7B | 62.4689 | ns |
| 812 | 28 | <i>Xiwa3987</i>       | 7B | 62.4689 | ns |
| 813 | 29 | <i>Xiwa1361</i>       | 7B | 62.4689 | ns |
| 814 | 30 | <i>Xiwa354</i>        | 7B | 63.5802 | ns |
| 815 | 31 | <i>Xiwa355</i>        | 7B | 63.5802 | ns |
| 816 | 32 | <i>Xiwa8232</i>       | 7B | 68.757  | ns |
| 817 | 33 | <i>Xiwa6322</i>       | 7B | 68.757  | ns |
| 818 | 34 | <i>Xiwa6667</i>       | 7B | 68.757  | ns |
| 819 | 35 | <i>Xiwa320</i>        | 7B | 91.9326 | ns |
| 820 | 36 | <i>Xiwa394</i>        | 7B | 91.9326 | ns |
| 821 | 37 | <i>Xiwa395</i>        | 7B | 91.9326 | ns |
| 822 | 38 | <i>Xiwa521</i>        | 7B | 93.0357 | ns |
| 823 | 39 | <i>Xiwa8519</i>       | 7B | 93.0357 | ns |
| 824 | 40 | <i>Xiwa520</i>        | 7B | 93.0357 | ns |
| 825 | 41 | <i>Xiwa2369</i>       | 7B | 107.801 | ns |
| 826 | 42 | <i>Xiwa6532</i>       | 7B | 107.801 | ns |
| 827 | 43 | <i>Xiwa130</i>        | 7B | 110.455 | ns |

|     |    |                       |    |         |    |
|-----|----|-----------------------|----|---------|----|
| 828 | 44 | <i>Xiwa2191</i>       | 7B | 112.712 | ns |
| 829 | 45 | <i>Xiwa4864</i>       | 7B | 112.712 | ns |
| 830 | 46 | <i>Xiwa2193</i>       | 7B | 113.442 | ns |
| 831 | 47 | <i>Xiwa4749</i>       | 7B | 113.442 | ns |
| 832 | 48 | <i>Xiwa6246</i>       | 7B | 113.442 | ns |
| 833 | 49 | <i>Xiwa7907</i>       | 7B | 114.172 | ns |
| 834 | 50 | <i>Xiwa2389</i>       | 7B | 115.275 | ns |
| 835 | 51 | <i>Xiwa7260</i>       | 7B | 116.005 | ns |
| 836 | 52 | <i>Xiwa7964</i>       | 7B | 116.005 | ns |
| 837 | 53 | <i>Xiwa1091</i>       | 7B | 116.005 | ns |
| 838 | 54 | <b><i>Xhbg396</i></b> | 7B | 119.458 | ns |
| 839 | 55 | <i>Xiwa1044</i>       | 7B | 120.278 | ns |
| 840 | 56 | <i>Xiwa4522</i>       | 7B | 120.278 | ns |
| 841 | 57 | <i>Xiwa4888</i>       | 7B | 120.278 | ns |
| 842 | 58 | <i>Xiwa7190</i>       | 7B | 120.278 | ns |
| 843 | 59 | <i>Xiwa181</i>        | 7B | 122.144 | ns |
| 844 | 60 | <i>Xiwa1647</i>       | 7B | 124.401 | ns |

---

ns = nonsignificant

\* =  $P < 0.05$

\*\* =  $P < 0.01$

\*\*\* =  $P < 0.005$

\*\*\*\* =  $P < 0.001$

\*\*\*\*\* =  $P < 0.0005$
